# Supplementary material for: Dynamic pathways of selenium metabolism and excretion in mice under different selenium nutritional statuses
Source: Royal Society of Chemistry journal article supplement (doi:10.1039/b915816b), 2009-12-24
Supplement: b915816b.pdf [file b915816b.pdf]

**Supplementary Information for Dynamic pathways of selenium metabolism and excretion in mice under different selenium nutritional statuses**

**Yoshinari Suzuki,\* Yoshiteru Hashiura,\* Kentaro Matsumura,\* Takahisa Matsukawa,\*\*Atsuko Shinohara,\*\* and Naoki Furuta\***

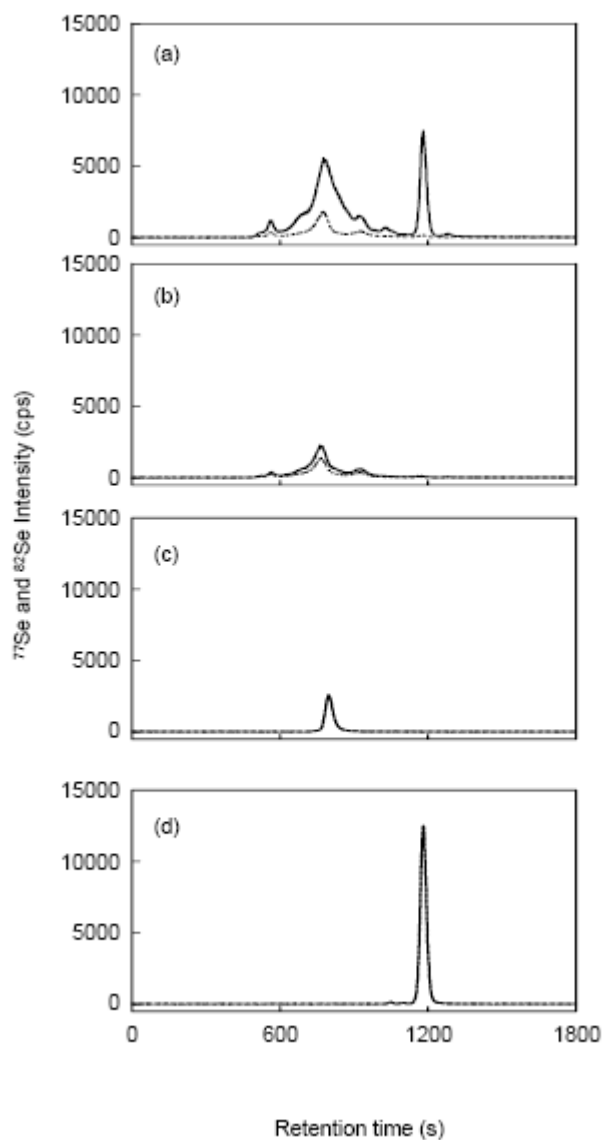

Fig. S1 Size exclusion chromatograms of hepatic cytosols for mice fed the control diets for (a) at 1 h after injection, (b) at 24 h after injection, and standards of (c) cGPx and (d) selenosugar. The dotted and solid lines indicate  $^{77}\text{Se}$  and  $^{82}\text{Se}$ , respectively.

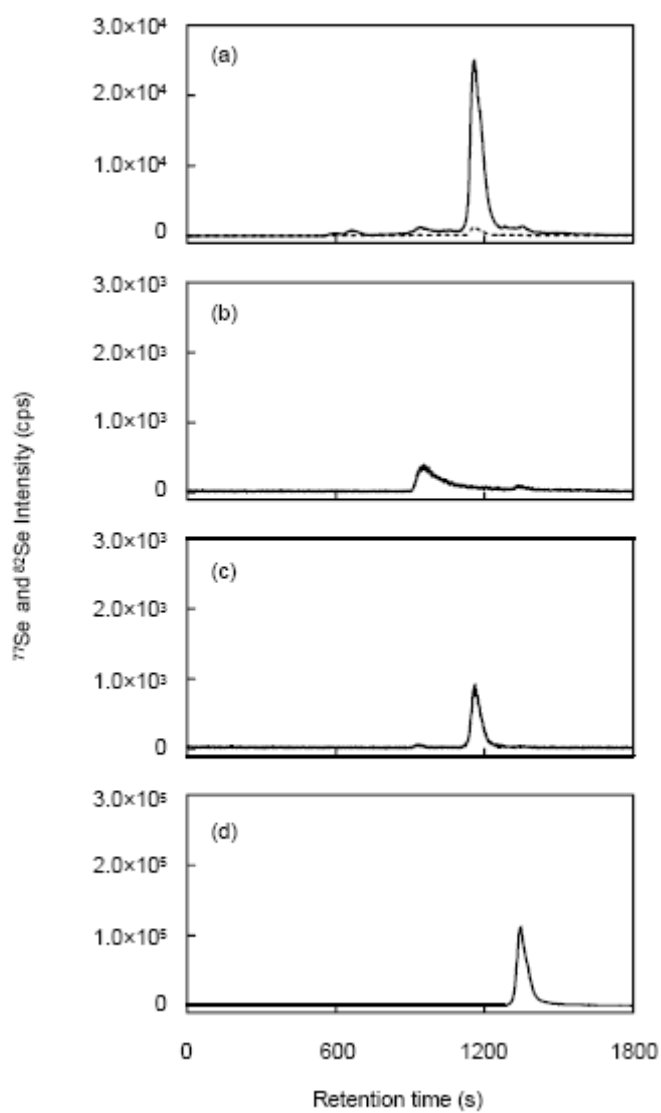

Fig. S2 Size exclusion chromatograms of urine for mice fed the control diets (a) at 0-24 h after injection, and standards of (b) selenite, (c) selenosugar, and (d)  $\text{TMSe}^+$ . The dotted and solid lines indicate  $^{77}\text{Se}$  and  $^{82}\text{Se}$ , respectively.
